# Supplementary material for: Regio- and stereoselective ring-opening of chiral 1,3-oxazolidin-2-one derivatives by organocopper reagents provides novel access to di-, tri- and tetra-substituted alkene dipeptide isosteresElectronic supplementary information (ESI) available: synthetic procedures and characterization for 4a,b, 5a,b, 7b, 8a,b, 9a,b, 10b, 11a,b, 12b,c, 13b, 14a,b, 15, 16a,b, 17a,b, 18, 19b, 20b. See http://www.rsc.org/suppdata/p1/b2/b203482d/
Source: Royal Society of Chemistry journal article supplement (doi:10.1039/b203482d), 2002-06-27
Supplement: b203482d.doc [file b203482d.doc]

**Supplementary data**

**Regio- and stereoselective ring-opening of chiral 1,3-oxazolidin-2-one derivatives by organocopper reagents provides novel access to di-, tri- and tetra-substituted alkene dipeptide isosteres.**

Shinya Oishi,a Ayumu Niida,a Takae Kamano,a Yoshihisa Miwa,a Tooru Taga,a Yoshihiko Odagaki,b Nobuyuki Hamanaka,b Mikio Yamamoto,c Keiichi Ajito,c Hirokazu Tamamura,a Akira Otakaa and Nobutaka Fujii*a

*a Graduate School of Pharmaceutical Sciences, Kyoto University, Sakyo-ku, Kyoto, 606-8501, Japan.*

*b Minase Research Institute, Ono Pharmaceutical Co. Ltd., Mishima-gun, Osaka, 618-8585, Japan.*

*c Pharmaceutical Research Center, Meiji Seika Kaisha, Ltd., Kohoku-ku, Yokohama, 222-0002, Japan.*

**Experimental**

**General procedure for *syn*-selective synthesis of amino alcohols 4a and 5a from amide 1: (3*R*,4*R*)-4-[*N*-(*tert*-butoxycarbonyl)amino]-3-methyl-5-phenylpent-1-en-3-ol 4a**

To a stirred solution of Boc-D-Phe-NMe(OMe) **1** (25.0 g, 81.1 mmol) in dry THF (250 cm3) was added dropwise a solution of MeMgBr (1.00 mol dm-3, 243 cm3, 243 mmol) in dry THF at – 78 °C under argon, and the mixture was stirred for 1.5 h at – 78 °C and for 1.5 h at 0 °C. The reaction was quenched with saturated citric acid at – 78 °C and the whole was extracted with EtOAc. The extract was washed successively with water, 5% NaHCO3 and brine, and dried over MgSO4. Concentration under reduced pressure gave a crude ketone, which was used immediately in next step without further purification. To a stirred suspension of anhydrous CeCl3 (59.9 g, 243 mmol) and the above ketone in dry THF (625 cm3) was added dropwise a solution of vinyl magnesium chloride (2.60 mol dm-3, 62.3 cm3, 162 mmol) in dry THF at 0 °C under argon. After 1.5 h, the reaction was quenched with saturated citric acid at – 78 °C. The mixture was concentrated under reduced pressure and extracted with EtOAc. The extract was washed successively with water, 5% NaHCO3 and brine, and dried over MgSO4. Concentration under reduced pressure followed by flash chromatography over silica gel with *n*-hexane-EtOAc (4:1) gave the amino alcohol **4a** and its isomer **4b** (8.76 g, 30.0 mmol, 37%). Compound **4a** was not isolated by recrystallization and flash chromatography over silica gel, **4a** containing small amount of **4b** was used for the next step without further purification.

**(3*R*,4*R*)-4-[*N*-(*tert*-Butoxycarbonyl)amino]-2,3-dimethyl-5-phenylpent-1-en-3-ol 5a**

By use of a procedure similar to that described for the preparation of the amino alcohol **4a** and **4b** from **1**, the amide **1** (25.0 g, 81.1 mmol) was converted into the title compound **5a** and its isomer **5b** (11.8 g, 38.6 mmol, 47%). The major isomer **5a** was isolated by repeated recrystallization.

*Compound* **5a**, colourless crystals,

mp 107-109 °C [from *n*-hexane-Et2O (3:1)] (Found: C, 70.55; H, 8.71; N, 4.64. C18H27NO3 requires C, 70.79; H, 8.91; N, 4.59%); []D26 + 95.0 (*c* 1.04 in CHCl3); H (270 MHz; CDCl3) 1.30 (9 H, s, CMe3), 1.39 (3 H, s, CMe), 1.82 (3 H, s, CMe), 2.74 (1 H, m, C*H*H), 3.02 (1 H, dd, *J* 14.1 and 3.3, CH*H*), 3.36 (1 H, s, OH), 3.79 (1 H, m, CH), 4.60 (1 H, d, *J* 8.5, NH), 4.90 (1 H, m, C*H*H=), 5.08 (1 H, m, CH*H*=), 7.15-7.35 (5 H, m, Ph).

**General procedure for synthesis of *anti*-amino alcohols 4b and 5b from amino alcohols 2 and 3: (3*S*,4*R*)-4-[*N*-(*tert*-butoxycarbonyl)amino]-3-methyl-5-phenylpent-1-en-3-ol 4b**

To a stirred solution of oxalyldichloride (9.44 cm3, 108 mmol) in CH2Cl2 (60 cm3) was added dropwise a solution of DMSO (15.3 cm3, 216 mmol) in CH2Cl2 (30 cm3) at – 78 °C under argon. After 30 min, a solution of the alcohol **2** (15.0 g, 54.1 mmol) in CH2Cl2 (60 cm3) was added to the above mixture at – 78 °C, and the mixture was stirred for 30 min at this temperature. To the mixture was added dropwise (Pri)2NEt (75.3 cm3, 432 mmol) at – 78 °C, and the stirring was continued for 1 h at 0 °C. The reaction was quenched with saturated NH4Cl (40 cm3), and the whole was extracted with Et2O. The extract was washed successively with 5% citiric acid and brine, and dried over MgSO4. Concentration under reduced pressure gave the corresponding enone, which was used for the next reaction without further purification. To a stirred suspension of anhydrous CeCl3 (62.2 g, 252 mmol) in dry THF (600 cm3) was added MeMgCl (3.00 mol dm-3, 72.1 cm3, 216 mmol) in dry THF at 0 °C under argon, and the mixture was stirred for 1.5 h. A solution of the above enone in dry THF (100 cm3) was added dropwise to the mixture at 0 °C. After 2 h, the reaction was quenched with saturated citric acid. The mixture was concentrated under reduced pressure and extracted with EtOAc. The extract was washed successively with water, 5% NaHCO3 and brine, and dried over MgSO4. Concentration under reduced pressure followed by flash chromatography over silica gel with *n*-hexane-EtOAc (4:1) gave the mixture of the amino alcohols **4a** and **4b** (5.05 g, 17.3 mmol, 32%). The major isomer **4b** was isolated by repeated recrystallization.

*Compound* **4b**, colourless crystals,

mp 138-139 °C [from *n*-hexane-Et2O (3:1)] [Found (FAB): (M + H)+, 292.1909. C17H26NO3 requires *M* +H, 292.1913]; []D21 + 24.0 (*c* 0.982 in CHCl3); H (300 MHz; CDCl3, at 320 K) 1.28 (9 H, br, CMe3), 1.34 (3 H, s, CMe), 2.41 (1 H, m, OH), 2.55 (1 H, m, C*H*H), 3.01 (1 H, dd, *J* 14.2 and 3.3, CH*H*), 3.75 (1 H, m, CH), 4.54 (1 H, m, NH), 5.20 (1 H, dd, *J* 10.7 and 1.2, C*H*H=) 5.37 (1 H, dd, *J* 17.2 and 1.2, CH*H*=), 5.98 (1 H, dd, *J* 17.2 and 10.7, CH=), 7.12-7.29 (5 H, m, Ph); *m/z* (FAB-LRMS) 292 (MH+, base peak), 236, 218, 164, 157, 120, 91, 73 and 57.

**(3*S*,4*R*)-4-[*N*-(*tert*-Butoxycarbonyl)amino]-2,3-dimethyl-5-phenylpent-1-en-3-ol 5b**

By use of a procedure similar to that described for the preparation of the amino alcohol **5a** and **5b** from **2**, the amino alcohol **3** (17.0 g, 58.3 mmol) was converted into the title compound **5a** and **5b** (9.00 g, 29.4 mmol, 50%).

*Compound* **5b**, colourless crystals,

mp 130-132 °C [from *n*-hexane-Et2O (3:1)] (Found: C, 70.91; H, 9.14; N, 4.54. C18H27NO3 requires C, 70.79; H, 8.91; N, 4.59%); []D27 + 16.4 (*c* 0.426 in CHCl3); H (300 MHz; CDCl3 at 320 K) 1.29 (9 H, br, CMe3), 1.34 (3 H, s. CMe), 1.85 (3 H, m, CMe), 1.94 (1 H, br, OH), 2.54 (1 H, m, C*H*H), 2.85 (1 H, dd, *J* 14.4 and 3.1, CH*H*), 3.95 (1 H, m, CH), 4.67 (1 H, m, NH), 4.95 (1 H, m, C*H*H=), 5.17 (1 H, m, CH*H*=), 7.11-7.28 (5 H, m, Ph).

**(4*S*,5*R*)-4-Benzyl-*N*-(*tert*-butoxycarbonyl)-5-ethenyl-1,3-oxazolidin-2-one 7b**

By use of a procedure similar to that described for the preparation of the 1,3-oxazolidin-2-one **7a** from **6a**, the alcohol **6b**19 (1.77 g, 6.38 mmol) was converted into the title compound **7b** (1.53 g, 5.04 mmol, 79%) as colourless crystals, mp 64-66 °C [from *n*-hexane-Et2O (3:1)] (Found: C, 67.15; H, 6.98; N, 4.57. C17H21NO4 requires C, 67.31; H, 6.98; N, 4.62%); []D20 – 15.6 (*c* 0.957 in CHCl3); H (300 MHz; CDCl3) 1.42 (9 H, s, CMe3), 2.96-3.02 (2 H, m, CH2), 4.56-4.67 (1 H, m, NCH), 4.98-5.06 (1 H, m, OCH), 5.36 (1 H, dt, *J* 10.6 and 1.3, C*H*H=), 5.49 (1 H, dt, *J* 17.1 and 1.3, CH*H*=), 5.76 (1 H, ddd, *J* 17.1, 10.6 and 5.69, CH=), 7.15-7.35 (5 H, m, Ph).

**(4*R*,5*R*)-4-Benzyl-*N*-(*tert*-butoxycarbonyl)-5-ethenyl-5-methyl-1,3-oxazolidin-2-one 8a**

By use of a procedure similar to that described for the preparation of the 1,3-oxazolidin-2-one **7a** from **6a**, the alcohol **4a** (9.16 g, 31.4 mmol) was converted into the title compound **8a** (8.57 g, 27.0 mmol, 85%) as colourless crystals, mp 147-148 °C (from EtOAc) (Found: C, 68.00; H, 7.35; N, 4.38. C18H23NO4 requires C, 68.12; H, 7.30; N, 4.41%); []D19 + 33.6 (*c* 0.802 in CHCl3); H (300 MHz; CDCl3) 1.39 (3 H, s, CMe), 1.41 (9 H, s, CMe3), 2.96 (1 H, dd, *J* 14.2 and 8.3, C*H*H), 3.12 (1 H, dd, *J* 14.2 and 5.7, CH*H*), 4.37 (1 H, dd, *J* 8.3 and 5.7, CH), 5.16 (1 H, d, *J* 10.8, C*H*H=), 5.34 (1 H, d, *J* 17.1, CH*H*=), 5.76 (1 H, dd, *J* 17.1 and 10.8, CH=), 7.20-7.36 (5 H, m, Ph).

**(4*R*,5*S*)-4-Benzyl-*N*-(*tert*-butoxycarbonyl)-5-ethenyl-5-methyl-1,3-oxazolidin-2-one 8b**

By use of a procedure similar to that described for the preparation of the 1,3-oxazolidin-2-one **7a** from **6a**, the alcohol **4b** (1.80 g, 6.18 mmol) was converted into the title compound **8b** (1.80 g, 5.67 mmol, 92%) as colourless crystals, mp 116-117 °C [from *n*-hexane-Et2O (3:1)] (Found: C, 68.12; H, 7.27; N, 4.17. C18H23NO4 requires C, 68.12; H, 7.30; N, 4.41%); []D20 + 38.7 (*c* 1.00 in CHCl3); H (270 MHz; CDCl3) 1.41-1.50 (12 H, m, CMe and CMe3), 2.82 (1 H, dd, *J* 13.8 and 8.5, C*H*H), 2.99 (1 H, dd, *J* 14.1 and 5.2, CH*H*), 4.28 (1 H, m, CH), 5.27 (1 H, dd, *J* 10.2 and 1.9, C*H*H=), 5.50 (1 H, dd, *J* 17.1 and 1.9, CH*H*=), 5.61 (1 H, dd, *J* 17.1 and 10.2, CH=), 7.14-7.33 (5 H, m, Ph).

**(4*R*,5*R*)-4-Benzyl-*N*-(*tert*-butoxycarbonyl)-5-methyl-5-(propen-2-yl)-1,3-oxazolidin-2-one 9a**

By use of a procedure similar to that described for the preparation of the 1,3-oxazolidin-2-one **7a** from **6a**, the alcohol **5a** (4.81 g, 15.7 mmol) was converted into the title compound **9a** (5.12 g, 15.4 mmol, 98%) as colourless crystals, mp 130-132 °C [from *n*-hexane-Et2O (3:1)] (Found: C, 68.65; H, 7.64; N, 4.02. C19H25NO4 requires C, 68.86; H, 7.60; N, 4.23%); []D27 + 40.1 (*c* 1.02 in CHCl3); H (270 MHz; CDCl3) 1.39 (3 H, s, CMe), 1.43 (9 H, s, CMe3), 1.64 (3 H, s, CMe), 2.96 (1 H, dd, *J* 14.1 and 8.5, C*H*H), 3.13 (1 H, dd, *J* 14.1 and 5.2, CH*H*), 4.46 (1 H, dd, *J* 8.5 and 5.2, CH), 4.90 (1 H, s, C*H*H=), 5.08 (1 H, s, CH*H*=), 7.20-7.37 (5 H, m, Ph).

**(4*R*,5*S*)-4-Benzyl-*N*-(*tert*-butoxycarbonyl)-5-methyl-5-(propen-2-yl)-1,3-oxazolidin-2-one 9b**

By use of a procedure similar to that described for the preparation of the 1,3-oxazolidin-2-one **7a** from **6a**, the alcohol **5b** (8.50 g, 27.8 mmol) was converted into the title compound **9b** (8.67 g, 26.1 mmol, 94%) as colourless crystals, mp 106-107 °C [from *n*-hexane-Et2O (3:1)] (Found: C, 68.88; H, 7.83; N, 4.41. C19H25NO4 requires C, 68.86; H, 7.60; N, 4.23%); []D20 + 78.0 (*c* 1.05 in CHCl3); H (270 MHz; CDCl3) 1.37 (9 H, s, CMe3), 1.46 (3 H, s, CMe), 1.50 (3 H, s, CMe), 2.80 (2 H, d, *J* 6.9, CH2), 4.27 (1 H, t, *J* 6.9, CH), 5.07 (1 H, m, C*H*H=), 5.34 (1 H, m, CH*H*=), 7.15-7.32 (5 H, m, Ph).

***tert*-Butyl (2*E*)-3-[(4*S*,5*R*)-4-benzyl-*N*-(*tert*-butoxycarbonyl)-1,3-oxazolidin-2-on-5-yl]prop-2-enoate 10b**

By use of a procedure similar to that described for the preparation of the ester **10a** from **7a**, the 1,3-oxazolidin-2-one **7b** (1.48 g, 4.87 mmol) was converted into the title compound **10b** (800 mg, 1.98 mmol, 40%) as colourless crystals, mp 163-165 °C [from *n*-hexane-EtOAc (3:1)] (Found: C, 65.22; H, 7.09; N, 3.41. C22H29NO6 requires C, 65.49; H, 7.24; N, 3.47%); []D24 + 22.4 (*c* 1.02 in CHCl3); H (300 MHz; CDCl3) 1.48 (9 H, s, CMe3), 1.49 (9 H, s, CMe3), 2.84 (1 H, dd, *J* 14.1 and 8.8, C*H*H), 3.03 (1 H, dd, *J* 14.1 and 4.7, CH*H*), 4.68 (1 H, ddd, *J* 8.8, 7.1 and 4.7, NCH), 5.12 (1 H, ddd, *J* 7.0, 4.7 and 1.8, OCH), 6.11 (1 H, dd, *J* 15.6 and 1.8, CH=), 6.53 (1 H, dd, *J* 15.6 and 4.6, CH=), 7.12-7.34 (5 H, m, Ph).

***tert*-Butyl (2*E*)-3-[(4*R*,5*R*)-4-benzyl-*N*-(*tert*-butoxycarbonyl)-5-methyl-1,3-oxazolidin-2-on-5-yl]prop-2-enoate 11a**

By use of a procedure similar to that described for the preparation of the ester **10a** from **7a**, the 1,3-oxazolidin-2-one **8a** (3.93 g, 12.3 mmol) was converted into the title compound **11a** (3.45 g, 8.26 mmol, 66%) as colourless crystals, mp 175-177 °C [from *n*-hexane-Et2O (3:1)]; (Found: C, 65.91; H, 7.53; N, 3.20. C23H31NO6 requires C, 66.17; H, 7.48; N, 3.35%); []D26 + 122.8 (*c* 0.692 in CHCl3); H(300 MHz; CDCl3) 1.41 (3 H, s, CMe), 1.45 (9 H, s, CMe3), 1.46 (9 H, s, CMe3), 2.97 (1 H, dd, *J* 14.4 and 9.0, C*H*H), 3.19 (1 H, dd, *J* 14.4 and 4.8, CH*H*), 4.43 (1 H, dd, *J* 9.0 and 4.8, CH), 6.00 (1 H, d, *J* 15.5, CH=), 6.62 (1 H, d, *J* 15.5, CH=), 7.21-7.36 (5 H, m, Ph).

***tert*-Butyl (2*E*)-3-[(4*R*,5*S*)-4-benzyl-*N*-(*tert*-butoxycarbonyl)-5-methyl-1,3-oxazolidin-2-on-5-yl]prop-2-enoate 11b**

By use of a procedure similar to that described for the preparation of the ester **10a** from **7a**, the 1,3-oxazolidin-2-one **8b** (1.52 g, 4.78 mmol) was converted into the title compound **11b** (1.07 g, 2.56 mmol, 53%) as colourless crystals, mp 169-171 °C [from *n*-hexane-Et2O (3:1)]; (Found: C, 66.17; H, 7.58; N, 3.33. C23H31NO6 requires C, 66.17; H, 7.48; N, 3.35%); []D19 + 5.08 (*c* 0.984 in CHCl3); H (300 MHz; CDCl3)1.45 (3 H, s, CMe), 1.50 (18 H, s, 2  CMe3), 2.75 (1 H, dd, *J* 14.1 and 9.1, C*H*H), 3.06 (1 H, dd, *J* 14.1 and 4.3, CH*H*), 4.34 (1 H, dd, *J* 9.1 and 4.3, CH), 6.11 (1 H, d, *J* 15.6, CH=), 6.46 (1 H, d, *J* 15.6, CH=), 7.13-7.34 (5 H, m, Ph).

***tert*-Butyl (2*E*)-3-[(4*R*,5*S*)-4-benzyl-*N*-(*tert*-butoxycarbonyl)-5-methyl-1,3-oxazolidin-2-on-5-yl]but-2-enoate 12b**

By use of a procedure identical with that described for the preparation of the ,-enoate **12a** from **9a**, the 1,3-oxazolidin-2-one **9b** (1.60 g, 4.82 mmol) was quantitatively converted to the corresponding ketone (1.60 g, 4.79 mmol) as colourless oil by successive treatment with ozone gas and Me2S, and purification by flash chromatography over silica gel with *n*-hexane-EtOAc (6:1). To a solution of the above ketone (790 mg, 2.37 mmol) in CHCl3 (5 cm3) was added Ph3P=CHCO2Bu*t* (4.02 g, 10.6 mmol), and the mixture was gently refluxed for 4 days. Concentration under reduced pressure followed by flash chromatography over silica gel with *n*-hexane-EtOAc (6:1) gave the title compound **12b** (412 mg, 0.954 mmol, 40%) as colourless crystals, mp 184-186 °C [from *n*-hexane-Et2O (3:1)]; (Found: C, 66.56; H, 7.61; N, 3.31. C24H33NO6 requires C, 66.80; H, 7.71; N, 3.25%); []D20 + 50.6 (*c* 1.06 in CHCl3); H (300 MHz; CDCl3)1.38 (9 H, s, CMe3), 1.50 (9 H, s, CMe3), 1.53 (3 H, s, CMe), 1.76 (3 H, d, *J* 1.2, CMe), 2.76 (1 H, dd, *J* 14.2 and 6.8, C*H*H), 2.82 (1 H, dd, *J* 14.2 and 6.8, CH*H*), 4.35 (1 H, t, *J* 6.8, CH), 6.16 (1 H, d, *J* 1.2, CH=), 7.10-7.32 (5 H, m, Ph).

***tert*-Butyl (2*Z*)-3-[(4*R*,5*S*)-4-benzyl-*N*-(*tert*-butoxycarbonyl)-5-methyl-1,3-oxazolidin-2-on-5-yl]but-2-enoate 12c**

To a stirred solution of (Cy)2NH (0.268 cm3, 1.35 mmol) in THF (2.1 cm3) was added dropwise a solution *n*-BuLi in *n*-hexane (1.56 mol dm-3, 0.865 cm3, 1.35 mmol) at – 78 °C, and the mixture was stirred for 15 min at this temperature. To the mixture was added Me3SiCH2CO2Bu*t* (0.295 cm3, 1.35 mmol) at – 78 °C. After 10 min, a solution of the ketone (150 mg, 0.450 mmol, prepared from **9b** by the similar procedure described above) in THF (0.5 cm3) was added dropwise to the mixture, and the mixture was stirred overnight with warming up to room temperature. The reaction was quenched with saturated citric acid and the whole was extracted with EtOAc. The extract was washed successively with brine, saturated NaHCO3 and brine, and dried over MgSO4. Concentration under reduced pressure followed by flash chromatography over silica gel with *n*-hexane-EtOAc (6:1) gave the title compound **12c** (26.0 mg, 0.0602 mmol, 13%) as colourless crystals, mp 139-141 °C [from *n*-hexane-Et2O (3:1)]; (Found: C, 66.69; H, 7.77; N, 3.28. C24H33NO6 requires C, 66.80; H, 7.71; N, 3.25%); []D20 + 57.1 (*c* 0.385 in CHCl3); H (300 MHz; CDCl3)1.29 (9 H, s, CMe3), 1.52 (9 H, s, CMe3), 1.65 (3 H, s, CMe), 1.94 (3 H, d, *J* 1.3, CMe), 2.52 (1 H, dd, *J* 13.9 and 8.6, C*H*H), 3.10 (1 H, dd, *J* 13.8 and 3.7, CH*H*), 5.15 (1 H, dd, *J* 8.4 and 3.6, CH), 5.82 (1 H, d, *J* 1.4, CH=), 7.08-7.30 (5 H, m, Ph).

***tert*-Butyl (2*R*,5*S*,3*E*)-5-[*N*-(*tert*-butoxycarbonyl)amino]-2-methyl-6-phenylhex-3-enoate (Boc-L-Phe-**[(*E*)-CH=CH]-L-Ala-OBu*t*) 13b**

By use of a procedure similar to that described for the preparation of the ester **13a** from **10a**, treatment of the ester **10b** (50.0 mg, 0.124 mmol) with MeCu(CN)MgCl·BF3·2LiCl in dry THF gave the title compound **13b** (42.3 mg, 0.112 mmol, 90%) as a colourless oil, [Found (FAB): (M + H)+, 376.2474. C22H34NO4 requires *M* +H, 376.2488]; []D23 - 17.4 (*c* 0.747 in CHCl3); H (300 MHz; CDCl3) 1.16 (3 H, d. *J* 7.0, CMe), 1.40 (9 H, s, CMe3), 1.41 (9 H, s, CMe3), 2.82 (2 H, d, *J* 6.0, CH2), 2.97 (1 H, m, 2-H), 4.33-4.47 (2 H, m, 5-H and NH), 5.47 (1 H, m, CH=), 5.60 (1 H, m, CH=), 7.12-7.32 (5 H, m, Ph); *m/z* (FAB-LRMS) 376 (MH+, base peak), 320, 284, 264, 228, 218, 184, 172, 157, 129, 91, 57.

***tert*-Butyl (2*S*,5*S*,3*E*)-5-[*N*-(*tert*-butoxycarbonyl)amino]-2-isopropyl-6-phenylhex-3-enoate (Boc-L-Phe-**[(*E*)-CH=CH]-D-Val-OBu*t*) 14a and *tert*-butyl (2*R*,5*S*,3*Z*)-5-[*N*-(*tert*-butoxycarbonyl)amino]-2-isopropyl-6-phenylhex-3-enoate (Boc-L-Phe-**[(*Z*)-CH=CH]-L-Val-OBu*t*) 15**

By use of a procedure similar to that described for the preparation of the ester **13a** from **10a**, treatment of the ester **10a** (50.0 mg, 0.124 mmol) with PriCu(CN)MgCl·BF3·2LiCl in dry THF gave the title compound **14a** and **15** (50.3 mg, 0.124 mmol, 99%).

*Compound* **14a**, colourless crystals,

mp 78-80 °C [from *n*-hexane-Et2O (10:1)]; (Found: C, 71.18; H, 9.50; N, 3.42. C24H37NO4 requires C, 71.43; H, 9.24; N, 3.47%); []D24 + 42.0 (*c* 1.42 in CHCl3); H (300 MHz; CDCl3)0.74 (3 H, d, *J* 6.7, CMe), 0.86 (3 H, d, *J* 6.7, CMe), 1.40 (9 H, s, CMe), 1.42 (9 H, s, CMe), 1.86 (1 H, m, CH), 2.50 (1 H, m, 2-H), 2.77 (1 H, dd, *J* 13.4 and 7.0, C*H*H), 2.87 (1 H, dd, *J* 13.6 and 5.4, CH*H*), 4.32-4.52 (2 H, m, 5-H and NH), 5.39-5.55 (2 H, m, 2  CH=), 7.12-7.30 (5 H, m, Ph).

*Compound* **15**, colourless crystals,

mp 74-75 °C [from *n*-hexane-Et2O (10:1)]; (Found: C, 71.68; H, 9.16; N, 3.28. C24H37NO4 requires C, 71.43; H, 9.24; N, 3.47%);  = - 11.98 (221 nm, isooctane); []D27 - 97.1 (*c* 0.422 in CHCl3); H (600 MHz; CDCl3)0.64 (3 H, d, *J* 6.4, CMe), 0.81 (3 H, d, *J* 6.5, CMe), 1.42 (18H, s, 2  CMe3), 1.74-1.84 (1 H, m, CH), 2.74 (1 H, dd, *J* 13.2 and 7.3, C*H*H), 2.91 (1 H, t, *J* 8.6, 2-H), 2.97 (1 H, m, CH*H*), 4.36-4.60 (2 H, m, 5-H and NH), 5.41 (1 H, dd, *J* 10.8 and 8.5, CH=), 5.45 (1 H, dd, *J* 10.8 and 9.8, CH=), 7.15-7.28 (5 H, m, Ph).

***tert*-Butyl (2*R*,5*S*,3*E*)-5-[*N*-(*tert*-butoxycarbonyl)amino]-2-isopropyl-6-phenylhex-3-enoate (Boc-L-Phe-**[(*E*)-CH=CH]-L-Val-OBu*t*) 14b**

By use of a procedure similar to that described for the preparation of the ester **13a** from **10a**, treatment of the ester **10b** (50.0 mg, 0.124 mmol) with PriCu(CN)MgCl·BF3·2LiCl in dry THF gave the title compound **14b** (48.3 mg, 0.119 mmol, 96%), mp 52-54 °C [from *n*-hexane-Et2O (10:1)]; (Found: C, 71.50; H, 9.05; N, 3.33. C24H37NO4 requires C, 71.43; H, 9.24; N, 3.47%); []D24 - 42.9 (*c* 1.142 in CHCl3); H (300 MHz; CDCl3)0.79 (3 H, d, *J* 6.7, CMe), 0.88 (3 H, d, *J* 6.6, CMe), 1.40 (9 H, s, CMe3), 1.41 (9 H, s, CMe3), 1.80-1.98 (1 H, m, CH), 2.49 (1 H, t, *J* 8.5, 2-H), 2.75-2.91 (2 H, m, CH2), 4.30-4.50 (2 H, m, 5-H and NH), 5.42 (1 H, dd, *J* 15.5 and 5.3, CH=), 5.51 (1 H, dd, *J* 15.5 and 8.4, CH=), 7.16-7.31 (5 H, m, Ph).

***tert*-Butyl (2*S*,5*S*,3*E*)-2-benzyl-5-[*N*-(*tert*-butoxycarbonyl)amino]-6-phenylhex-3-enoate (Boc-L-Phe-**[(*E*)-CH=CH]-D-Phe-OBu*t*) 16a**

By use of a procedure similar to that described for the preparation of the ester **13a** from **10a**, treatment of the ester **10a** (50.0 mg, 0.124 mmol) with BnCu(CN)MgCl·BF3·2LiCl in dry THF gave the title compound **16a** (55.4 mg, 0.122 mmol, 99%) as a colourless oil, [Found (FAB): (M + H)+, 452.2790. C28H38NO4 requires *M* +H, 452.2801]; []D26 + 22.7 (*c* 1.27 in CHCl3); H (600 MHz; CDCl3) 1.32 (9 H, s, CMe3), 1.40 (9 H, s, CMe3), 2.71 (1 H, dd, *J* 13.6 and 6.9, C*H*H), 2.77 (2 H, m, 6-CH2), 2.95 (1 H, dd, *J* 13.6 and 8.3, CH*H*), 3.15 (1 H, m, 2-H), 4.20-4.60 (2 H, m, 5-H and NH), 5.42 (1 H, m, CH=), 5.56 (1 H, dd, *J* 15.7 and 8.2, CH=), 7.05-7.28 (10 H, m, Ph) ; *m/z* (FAB-LRMS) 452 (MH+, base peak), 340, 294, 261, 248, 233, 204, 117, 91, 57, 41.

***tert*-Butyl (2*R*,5*S*,3*E*)-2-benzyl-5-[*N*-(*tert*-butoxycarbonyl)amino]-6-phenylhex-3-enoate (Boc-L-Phe-**[(*E*)-CH=CH]-L-Phe-OBu*t*) 16b**

By use of a procedure similar to that described for the preparation of the ester **13a** from **10a**, treatment of the ester **10b** (50.0 mg, 0.124 mmol) with BnCu(CN)MgCl·BF3·2LiCl in dry THF gave the title compound **16b** (55.4 mg, 0.122 mmol, 99%) as a colourless oil, [Found (FAB): (M + H)+, 452.2815. C28H38NO4 requires *M* +H, 452.2801]; []D26 - 44.7 (*c* 1.02 in CHCl3); H (600 MHz; CDCl3) 1.32 (9 H, s, CMe3), 1.40 (9 H, s, CMe3), 2.70 (2 H, m, C*H*H and 6-C*H*H), 2.79 (1 H, m, 6-CH*H*), 2.97 (1 H, dd, *J* 13.6 and 8.0, CH*H*), 3.13 (1 H, m, 2-H), 4.37 (2 H, m, 5-H and NH), 5.38 (1 H, dd, *J* 15.5 and 5.4, CH=), 5.55 (1 H, dd, *J* 15.4 and 8.4, CH=), 7.06-7.36 (10 H, m, Ph); *m/z* (FAB-LRMS) 452 (MH+, base peak), 340, 294, 248, 233, 204, 164, 129, 117, 91, 57, 41.

***tert*-Butyl (2*R*,5*R*,3*E*)-5-[*N*-(*tert*-butoxycarbonyl)amino]-2-isopropyl-4-methyl-6-phenylhex-3-enoate (Boc-D-Phe-**[(*E*)-CMe=CH]-L-Val-OBu*t*) 17a and *tert*-butyl (2*S*,5*R*,3*Z*)-5-[*N*-(*tert*-butoxycarbonyl)amino]-2-isopropyl-4-methyl-6-phenylhex-3-enoate (Boc-D-Phe-**[(*Z*)-CMe=CH]-D-Val-OBu*t*) 18**

By use of a procedure similar to that described for the preparation of the ester **13a** from **10a**, treatment of the ester **11a** (50.0 mg, 0.119 mmol) with PriCu(CN)MgCl·BF3·2LiCl in dry THF gave the title compound **17a** (34.0 mg, 0.0816 mmol, 68%) and **18** (15.6 mg, 0.0375 mmol, 31%),

*Compound* **17a**, colourless crystals,

mp 81-83 °C (from *n*-hexane); (Found: C, 71.76; H, 9.45; N, 3.36. C25H39NO4 requires C, 71.91; H, 9.41; N, 3.35%);  = - 8.32 (218 nm, isooctane); []D26 - 40.1 (*c* 1.14 in CHCl3); H (300 MHz; CDCl3) 0.66 (3 H, d, *J* 6.7 , CMe), 0.85 (3 H, d, *J* 6.6, CMe), 1.38 (9 H, s, CMe3), 1.42 (9 H, s, CMe3), 1.66 (3 H, d, *J* 1.1, CMe), 1.83 (1 H, m, CH), 2.76 (1 H, dd, *J* 9.8 and 8.8, 2-H), 2.82 (2 H, d, *J* 7.1, CH2), 4.25 (1 H, m, 5-H), 4.56 (1 H, m, NH), 5.23 (1 H, m, CH=), 7.11-7.29 (5 H, m, Ph).

*Compound* **18**, colourless crystals,

mp 112-113 °C (from *n*-hexane); (Found: C, 71.89; H, 9.35; N, 3.37. C25H39NO4 requires C, 71.91; H, 9.41; N, 3.35%);  = + 17.01 (222 nm, isooctane); []D27 + 92.4 (*c* 1.44 in CHCl3); H (300 MHz; CDCl3)0.63 (3 H, d, *J* 5.3, CMe), 0.81 (3 H, d, *J* 6.6, CMe), 1.38 (9 H, s, CMe3), 1.43 (9 H, s, CMe3), 1.63-1.78 (4 H, m, CMe and CH), 2.75 (1 H, dd, *J* 13.5 and 7.2, C*H*H), 2.86-2.98 (2 H, m, C*H*H and 2-H), 4.58 (1 H, m*,* NH), 4.67 (1 H,m, 5-H),5.*2*4 *(*1H, d, *J* 9.3, CH=), 7.14-7.29 (5 H, m, Ph).

***tert*-Butyl (2*S*,5*R*,3*E*)-5-[*N*-(*tert*-butoxycarbonyl)amino]-2-isopropyl-4-methyl-6-phenylhex-3-enoate (Boc-D-Phe-**[(*E*)-CMe=CH]-D-Val-OBu*t*) 17b**

By use of a procedure similar to that described for the preparation of the ester **13a** from **10a**, treatment of the ester **11b** (50.0 mg, 0.119 mmol) with PriCu(CN)MgCl·BF3·2LiCl in dry THF gave the title compound **17b** (47.6 mg, 0.113 mmol, 95%) as colourless crystals, mp 69-71 °C (from *n*-hexane); (Found: C, 71.71; H, 9.25; N, 3.29. C25H39NO4 requires C, 71.91; H, 9.41; N, 3.35%);  = + 6.17 (225 nm, isooctane); []D24 + 55.6 (*c* 0.953 in CHCl3); H (600 MHz; CDCl3) 0.79 (3 H, d, *J* 6.6, CMe), 0.89 (3 H, d, *J* 6.6, CMe), 1.37 (9 H, s, CMe3), 1.38 (9 H, s, CMe3), 1.66 (3 H, d, *J* 1.1, CMe), 1.89 (1 H, m, CH), 2.72-2.92 (3 H, m, CH2 and 2-H), 4.32 (1 H, m, 5-H), 4.55 (1 H, m, NH), 5.28 (1 H, d, *J* 9.9, CH=), 7.12-7.32 (5 H, m, Ph).

***tert*-Butyl (2*S*,5*R*,3*E*)-5-[*N*-(*tert*-butoxycarbonyl)amino]-2-isopropyl-3,4-dimethyl-6-phenylhex-3-enoate (Boc-D-Phe-**[(*E*)-CMe=CMe]-D-Val-OBu*t*) 19b and *tert*-butyl (2*R*,5*R*,3*Z*)-5-[*N*-(*tert*-butoxycarbonyl)amino]-2-isopropyl-3,4-dimethyl-6-phenylhex-3-enoate (Boc-D-Phe-**[(*Z*)-CMe=CMe]-L-Val-OBu*t*) 20b**

By use of a procedure similar to that described for the preparation of the ester **19a** and **20a** from **12a**, treatment of the ester **12b** (50.0 mg, 0.115 mmol) with Pri3Cu(CN)(MgCl)3·BF3·2LiCl in dry THF at – 78 °C for 30 min and at 0 °C for 3 h gave the title compound **19b** (26.0 mg, 0.0603 mmol, 52%) and **20b** (12.3 mg, 0.0286 mmol, 25%).

*Compound* **19b**, colourless crystals,

mp 111-113 °C (from *n*-hexane); (Found: C, 72.32; H, 9.48; N, 3.12. C26H41NO4 requires C, 72.35; H, 9.57; N, 3.25%);  = + 18.09 (230 nm, isooctane); []D25 + 82.4 (*c* 0.752 in CHCl3); H (600 MHz; CDCl3) 0.72 (3 H, d, *J* 6.3, CMe), 0.92 (3 H, d, *J* 6.3, CMe), 1.36 (9 H, s, CMe3), 1.38 (9 H, s, CMe3), 1.53 (3 H, s, CMe), 1.66 (3 H, s, CMe), 2.06 (1 H, m, CH), 2.70 (1 H, m, C*H*H), 2.81 (1 H, m, CH*H*), 2.97 (1 H, d, *J* 10.7, 2-H), 4.62 (1 H, m, NH), 4.86 (1 H, m, 5-H), 7.14-7.28 (5 H, m, Ph).

*Compound* **20b**, colourless oil,

[Found (FAB): (M + H)+, 432.3112. C26H42NO4 requires *M* +H, 432.3114];  = - 29.22 (226 nm, isooctane); []D23 – 188.2 (*c* 0.696 in CHCl3); H (600 MHz; CDCl3) 0.76 (3 H, d, *J* 6.6, CMe), 0.99 (3 H, d, *J* 6.4, CMe), 1.27 (9 H, s, CMe3), 1.42 (9 H, s, CMe3), 1.59 (3 H, s, CMe), 1.66 (3 H, s, CMe), 2.16 (1 H, m, CH), 2.72 (1 H, m, C*H*H), 2.87 (1 H, m, CH*H*), 3.40 (1 H, m, 2-H), 4.55 (1 H, m, NH), 5.09 (1 H, m, 5-H), 7.17-7.32 (5 H, m, Ph); *m/z* (FAB-LRMS) 432 (MH+, base peak), 340, 284, 259, 228, 184, 164, 91, 57.
